# Supplementary material for: Development of antithrombotic peptides based on the molecular interactions between von Willebrand factor and GPIbα
Source: Royal Society of Chemistry journal article supplement (doi:10.1039/d2cp03148e), 2022-01-01
Supplement: d2cp03148e1.pdf [file d2cp03148e1.pdf]

## Supporting Information

# Development of antithrombotic peptides based on the molecular interactions between von Willebrand factor and GPIIb/IIIa

*Ran Chen<sup>a</sup>, Si Zheng<sup>a</sup>, Lin Zhang<sup>a\*</sup>*

<sup>a</sup>Department of Biochemical Engineering and Key Laboratory of Systems Bioengineering of the Ministry of Education, School of Chemical Engineering and Technology, Tianjin University, Tianjin 300350, People's Republic of China

## Corresponding Author

\*Tel: +86 22 27403389. Fax: +86 22 27403389. E-mail: linzhang@tju.edu.cn (L. Zhang).

**Table S1. Screening of inhibitor by docking and binding conformation**

| candidate | label | $E_{vina}$ (kcal/mol) | RMSD(nm) |
|-----------|-------|-----------------------|----------|
| EWEYWDPD  | I1    | -7.5                  | 0.341763 |
| EPEGFDWD  | I2    | -7.5                  | 0.357641 |
| ESEYWDYD  | I3    | -7.5                  | 0.362230 |
| EPEGPDWD  | I4    | -7.5                  | 0.365492 |
| EAEYWDFD  | I5    | -7.6                  | 0.366498 |
| EGEYWDFD  | I6    | -7.5                  | 0.374358 |
| EGEPWDGD  | I7    | -7.7                  | 0.377362 |
| EPEWWDVD  | I8    | -8.2                  | 0.379835 |
| ESEYWDFD  | I9    | -7.5                  | 0.380284 |
| EPEWLDYD  | I10   | -7.7                  | 0.381267 |
| EPEPWDPD  | I11   | -7.9                  | 0.385159 |
| EPEWFDWD  | I12   | -7.8                  | 0.385899 |
| EDECGDWD  | I13   | -7.5                  | 0.390631 |
| EAEPFDCD  | I14   | -7.5                  | 0.392722 |
| EGEPWDL D | I15   | -7.8                  | 0.393510 |
| EWEYWDDD  | I16   | -7.6                  | 0.396083 |
| EAEPWDPD  | I17   | -7.6                  | 0.398703 |
| EPEWDE D  | I18   | -7.9                  | 0.399933 |

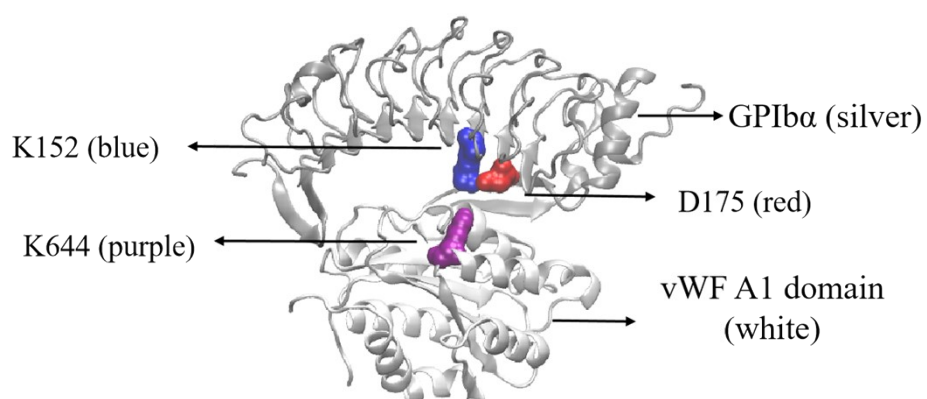

Figure S1. Molecular interface around K644.

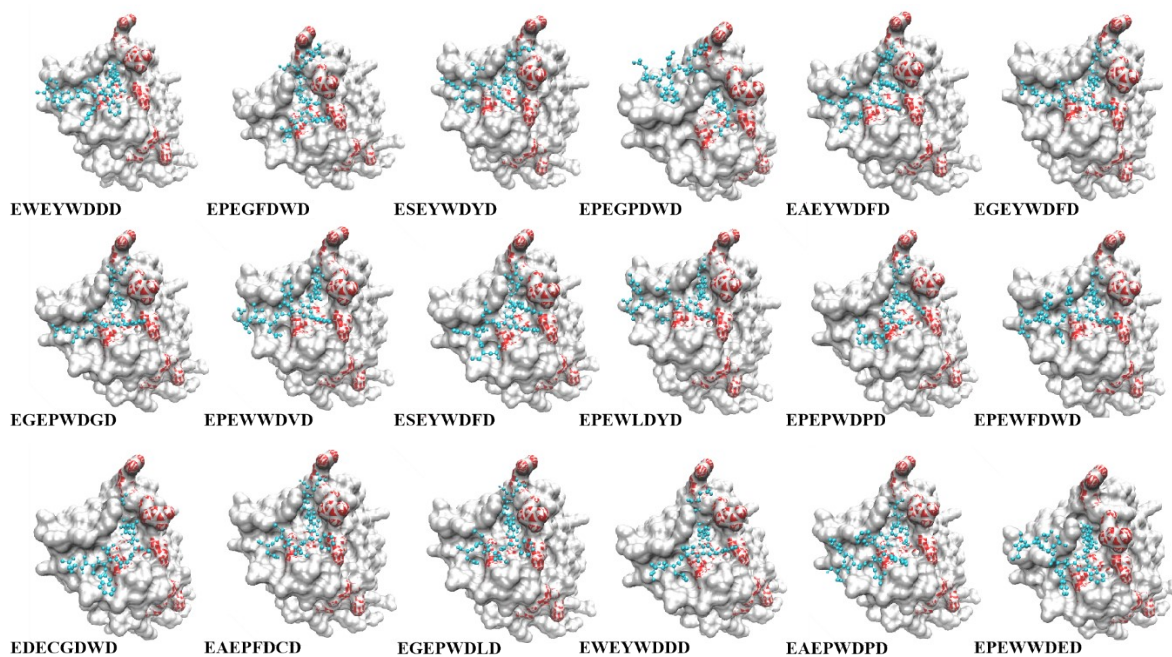

Figure S2. Binding conformation of inhibitors. vWF A1 domain is shown as a Surf structure and the key amino acid residues are in red. The inhibitors are shown as a CPK structure in cyan.

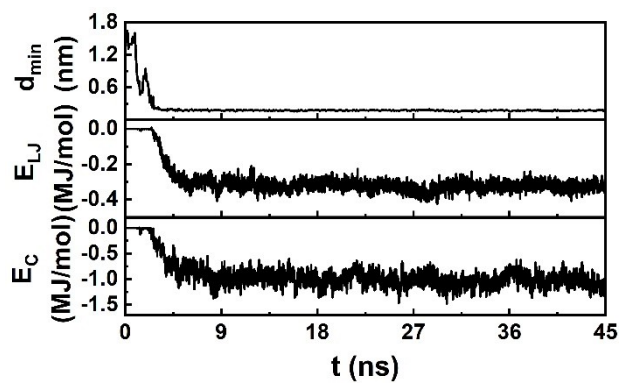

Figure S3. Time courses of  $d_{\min}$ ,  $E_C$  and  $E_{LJ}$  between vWF A1 domain and GPIIb.

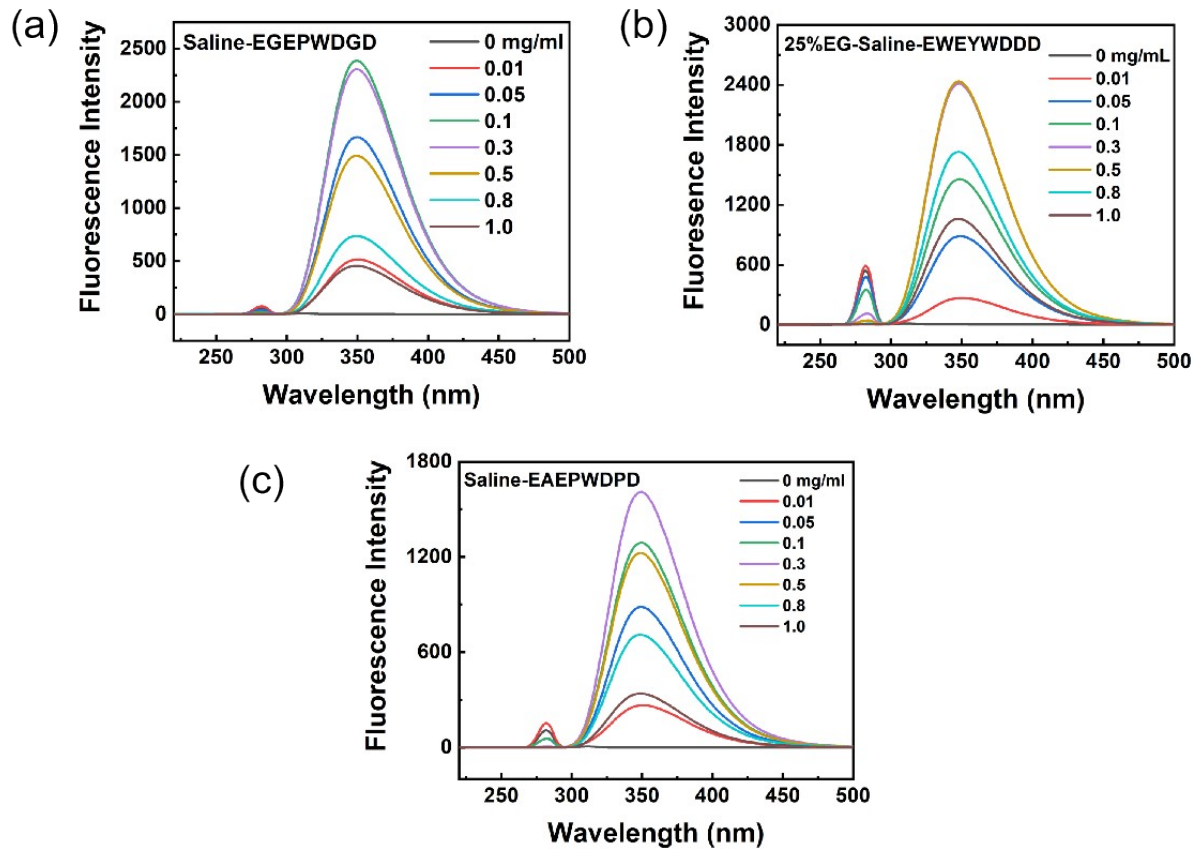

Figure S4. Fluorescence spectra of EGEPWDGD (a), EWEYWDDD (b), EAEPWDPD (c).

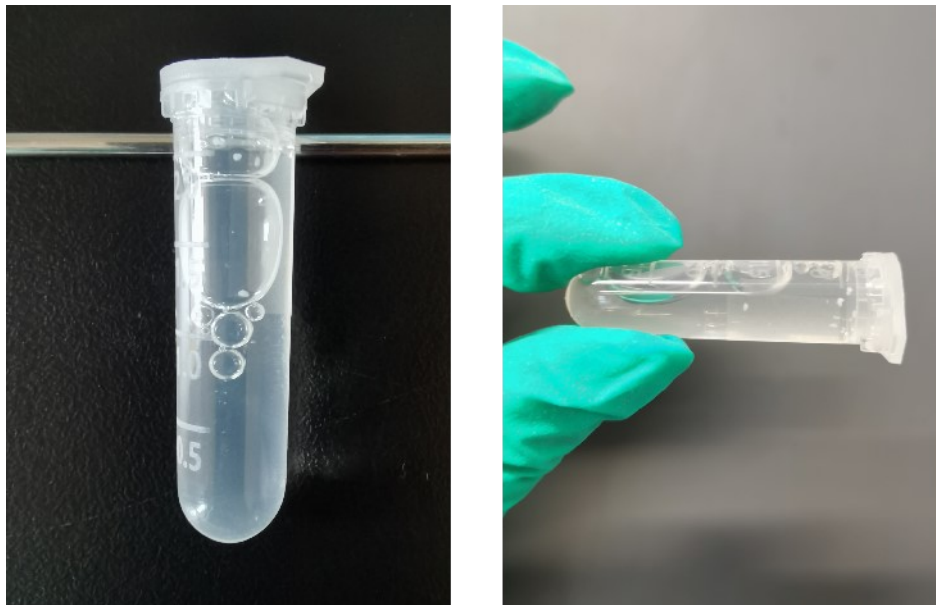

Figure S5. Dissolution of I16 in PRP.
